# Supplementary material
Source: PubMed Central journal article supplement (PMC7003293)
Supplement: ASN.2019060574SupplementaryData.pdf [file ASN.2019060574SupplementaryData.pdf]

## Table of contents

|                                                                                                                                                                                        |          |
|----------------------------------------------------------------------------------------------------------------------------------------------------------------------------------------|----------|
| <b>Supplemental Table 1: Baseline characteristics comparing between participants with and without missing values .....</b>                                                             | <b>2</b> |
| <b>Supplemental Table 2: Baseline characteristics by ESRD status at end of follow-up .....</b>                                                                                         | <b>3</b> |
| <b>Supplemental Table 3: Hazard ratios of ESRD in Fine and Gray model treating death as a competing event.....</b>                                                                     | <b>4</b> |
| <b>Supplemental Table 4: Adjusted hazard ratios of ESRD comparing the risk between the time-periods following CVD and free of CVD using the inverse probability weighting .....</b>    | <b>5</b> |
| <b>Supplemental Table 5: Adjusted hazard ratios of ESRD comparing the risk between the time-periods following CVD and free of CVD using the propensity score matched analysis.....</b> | <b>6</b> |
| <b>Supplemental Figure 1: Mock examples of how participants contributed person-time to CVD status.....</b>                                                                             | <b>7</b> |
| <b>Supplemental Figure 2: Histograms for years from CVD to ESRD.....</b>                                                                                                               | <b>8</b> |

**Supplemental Table 1: Baseline characteristics comparing between participants with and without missing values**

| Characteristics                              | Missing values |              | No. of missing |
|----------------------------------------------|----------------|--------------|----------------|
|                                              | No (n= 9,047)  | Yes (n= 409) |                |
| Age, years mean (SD)                         | 63 (5.6)       | 62 (5.9)     | 0              |
| Female, No (%)                               | 5,295 (59)     | 220 (54)     | 0              |
| Black race, No (%)                           | 1,942 (22)     | 177 (43)     | 0              |
| Body mass index, kg/m <sup>2</sup> mean (SD) | 29 (5.5)       | 29 (6.0)     | 27             |
| Ever smoke, No (%)                           | 5125 (57)      | 189 (46)     | 78             |
| Ever drink, No (%)                           | 7,194 (80)     | 251 (61)     | 79             |
| Received education 12 years or more, No (%)  | 7,453 (82)     | 319 (78)     | 9              |
| Systolic blood pressure, mmHg mean (SD)      | 127 (19)       | 131 (23)     | 14             |
| Diastolic blood pressure, mmHg mean (SD)     | 71 (10)        | 73 (12)      | 14             |
| Antihypertensive drugs, No (%)               | 3,353 (37)     | 195 (48)     | 0              |
| Diabetes, No (%)                             | 1,295 (14)     | 70 (17)      | 117            |
| eGFR, ml/min/1.73m <sup>2</sup> mean (SD)    | 87 (16)        | 90 (16)      | 255            |
| ACR, mg/g mean (SD)                          | 19 (152)       | 27 (187)     | 126            |
| CRP, mg/l mean (SD)                          | 4.3 (6.2)      | 4.2 (5.6)    | 255            |
| Total cholesterol, mg/dL mean (SD)           | 202 (36)       | 198 (37)     | 81             |
| HDL-C, mg/dL mean (SD)                       | 51 (17)        | 51 (17)      | 81             |
| COPD, No (%)                                 | 223 (2.5)      | 14 (3.4)     | 0              |
| Cancer, No (%)                               | 514 (5.7)      | 28 (6.8)     | 0              |

Abbreviation: ESRD, end-stage renal disease; eGFR, estimated glomerular filtration rate; ACR, urinary albumin-to-creatinine ratio; CRP, C-reactive protein; HDL-C, high-density lipoprotein cholesterol; COPD, chronic obstructive pulmonary disease

**Supplemental Table 2: Baseline characteristics by ESRD status at end of follow-up**

| Characteristics                              | ESRD status  |             | P-value |
|----------------------------------------------|--------------|-------------|---------|
|                                              | No (n=8,817) | Yes (n=210) |         |
| Age, years mean (SD)                         | 62 (5.6)     | 64 (5.6)    | <0.001  |
| Female, No (%)                               | 5,183 (59)   | 112 (53)    | 0.12    |
| Black race, No (%)                           | 1,860 (21)   | 82 (39)     | <0.001  |
| Body mass index, kg/m <sup>2</sup> mean (SD) | 29 (5.5)     | 31 (6.2)    | <0.001  |
| Ever smoke, No (%)                           | 4,997 (57)   | 128 (61)    | 0.20    |
| Ever drink, No (%)                           | 7,036 (80)   | 158 (75)    | 0.12    |
| Received education 12 years or more, No (%)  | 7,299 (83)   | 154 (73)    | <0.001  |
| Systolic blood pressure, mmHg mean (SD)      | 127 (19)     | 138 (21)    | <0.001  |
| Diastolic blood pressure, mmHg mean (SD)     | 71 (10)      | 73 (11)     | 0.01    |
| Antihypertensive drugs, No (%)               | 3,222 (37)   | 131 (62)    | <0.001  |
| Diabetes, No (%)                             | 1,204 (14)   | 91 (43)     | <0.001  |
| Laboratory tests                             |              |             |         |
| eGFR (ml/min/1.73m <sup>2</sup> ), No (%)    |              |             |         |
| ≥ 90                                         | 3,938 (45)   | 52 (25)     | <0.001  |
| 60-89                                        | 4460 (50)    | 101 (48)    |         |
| 45-59                                        | 344 (4)      | 35 (17)     |         |
| 30-44                                        | 95 (1)       | 22 (10)     |         |
| ACR (mg/g), No (%)                           |              |             |         |
| < 10                                         | 7,326 (83)   | 107 (51)    | <0.001  |
| 10-29                                        | 1007 (11)    | 28 (13)     |         |
| 30-299                                       | 441 (5)      | 41 (20)     |         |
| ≥ 300                                        | 63 (1)       | 34 (16)     |         |
| CRP, mg/l mean (SD)                          | 4.2 (6.2)    | 6.2 (8.2)   | <0.001  |
| Total cholesterol, mg/dL mean (SD)           | 202 (36)     | 202 (42)    | 0.88    |
| HDL-C, mg/dL mean (SD)                       | 51 (17)      | 47 (16)     | <0.001  |
| Past medical history, No (%)                 |              |             |         |
| COPD                                         | 212 (2.4)    | 11 (5.2)    | 0.009   |
| Cancer                                       | 497 (5.6)    | 17 (8.1)    | 0.126   |

Abbreviation: ESRD, end-stage renal disease; eGFR, estimated glomerular filtration rate; ACR, urinary albumin-to-creatinine ratio; CRP, C-reactive protein; HDL-C, high-density lipoprotein cholesterol; COPD, chronic obstructive pulmonary disease

**Supplemental Table 3: Hazard ratios of ESRD in Fine and Gray model treating death as a competing event**

|         | CVD subtypes, hazard ratio (95%CI) |                     |                        |                  |
|---------|------------------------------------|---------------------|------------------------|------------------|
|         | Heart failure                      | Atrial fibrillation | Coronary heart disease | Stroke           |
| Model 1 | 16.15 (11.39-22.91)                | 3.69 (2.57-5.31)    | 4.22 (2.89-6.17)       | 1.75 (1.02-3.01) |
| Model 2 | 11.40 (8.38-15.50)                 | 2.66 (1.87-3.79)    | 3.67 (2.53-5.33)       | 1.44 (0.85-2.44) |
| Model 3 | 7.13 (4.65-10.93)                  | 1.15 (0.74-1.80)    | 1.60 (1.03-2.48)       | 0.90 (0.49-1.65) |

Model 1 adjusted for age, sex, and race. Model 2 additionally adjusted for body mass index, ever smoking, ever drink, years of education, systolic blood pressure, antihypertensive drugs, diabetes, eGFR, ACR, CRP, total cholesterol, HDL-C, and history of COPD and cancer. Covariates were timely updated when available. Model 3 additionally adjusted for CVD subtypes (e.g., atrial fibrillation, coronary heart disease, and stroke for analysis of heart failure). ESRD indicates end-stage renal disease. HR indicates hazard ratio.

**Supplemental Table 4: Adjusted hazard ratios of ESRD comparing the risk between the time-periods following CVD and free of CVD using the inverse probability weighting**

|         | CVD subtypes, hazard ratio (95%CI) |                     |                        |                  |
|---------|------------------------------------|---------------------|------------------------|------------------|
|         | Heart failure                      | Atrial fibrillation | Coronary heart disease | Stroke           |
| Model 1 | 14.82 (10.27-21.39)                | 3.09 (2.10-4.56)    | 3.38 (2.25-5.08)       | 1.71 (0.97-3.03) |
| Model 2 | 9.96 (7.04-14.07)                  | 2.68 (1.80-3.99)    | 3.27 (2.14-4.98)       | 1.53 (0.85-2.76) |
| Model 3 | 9.37 (6.37-13.79)                  | 0.98 (0.63-1.53)    | 1.47 (0.91-2.36)       | 0.93 (0.51-1.70) |

Model 1 adjusted for age, sex, and race. Model 2 additionally adjusted for body mass index, ever smoking, ever drink, years of education, systolic blood pressure, antihypertensive drugs, diabetes, eGFR, ACR, CRP, total cholesterol, HDL-C, and history of COPD and cancer. Covariates were timely updated when available. Model 3 additionally adjusted for CVD subtypes (e.g., atrial fibrillation, coronary heart disease, and stroke for analysis of heart failure). CVD indicates cardiovascular disease.

**Supplemental Table 5: Adjusted hazard ratios of ESRD comparing the risk between the time-periods following CVD and free of CVD using the propensity score matched analysis**

|         | CVD subtypes, hazard ratio (95%CI) |                     |                        |                  |
|---------|------------------------------------|---------------------|------------------------|------------------|
|         | Heart failure                      | Atrial fibrillation | Coronary heart disease | Stroke           |
| Model 1 | 21.28 (14.32-31.62)                | 3.28 (2.26-4.78)    | 3.69 (2.49-5.49)       | 1.76 (1.02-3.06) |
| Model 2 | 12.36 (8.12-18.83)                 | 2.52 (1.69-3.78)    | 3.58 (2.35-5.46)       | 1.26 (0.68-2.35) |
| Model 3 | 10.58 (6.79-16.48)                 | 1.19 (0.77-1.83)    | 1.86 (1.17-2.96)       | 1.11 (0.60-2.04) |

Model 1 adjusted for age, sex, and race. Model 2 additionally adjusted for body mass index, ever smoking, ever drink, years of education, systolic blood pressure, antihypertensive drugs, diabetes, eGFR, ACR, CRP, total cholesterol, HDL-C, and history of COPD and cancer. Covariates were timely updated when available. Model 3 additionally adjusted for CVD subtypes (e.g., atrial fibrillation, coronary heart disease, and stroke for analysis of heart failure). CVD indicates cardiovascular disease.

**Supplemental Figure 1: Hypothetical examples of how participants contributed person-time to CVD status.** Each participant contributed to person-time for CVD status “0” when free of each cardiovascular phenotype (for simplicity, this figure shows only coronary heart disease and heart failure). Once a cardiovascular subtype occurred, the participant contributed to person-time for that relevant cardiovascular phenotype. For example, participant A developed coronary heart disease in 2004 but did not develop ESRD. Participant B developed coronary heart disease in 2000, heart failure in 2004, and then ESRD in 2008. This ESRD was linked to both coronary disease and heart failure. Participant C developed heart failure in 2004 and then ESRD in 2012, without developing coronary heart disease. This ESRD was linked to heart failure but not to coronary heart disease. Participant D did not develop any CVD until exiting the cohort because of death in 2012. CVD indicates cardiovascular disease. ESRD indicates end-stage renal disease.

| Year                   | Visit 4 |      |      |      |      |      | End of follow-up |   |      |   |   |
|------------------------|---------|------|------|------|------|------|------------------|---|------|---|---|
|                        | 1996    | 2000 | 2004 | 2008 | 2012 | 2015 |                  |   |      |   |   |
| <b>Participant A</b>   |         |      |      |      |      |      |                  |   |      |   |   |
| Coronary heart disease | 0       | 0    | 0    | 0    | 1    | 1    | 1                | 1 | 1    | 1 | 1 |
| Heart failure          | 0       | 0    | 0    | 0    | 0    | 0    | 0                | 0 | 0    | 0 | 0 |
| <b>Participant B</b>   |         |      |      |      |      |      |                  |   |      |   |   |
| Coronary heart disease | 0       | 0    | 1    | 1    | 1    | 1    | ESRD             |   |      |   |   |
| Heart failure          | 0       | 0    | 0    | 0    | 1    | 1    | ESRD             |   |      |   |   |
| <b>Participant C</b>   |         |      |      |      |      |      |                  |   |      |   |   |
| Coronary heart disease | 0       | 0    | 0    | 0    | 0    | 0    | 0                | 0 | ESRD |   |   |
| Heart failure          | 0       | 0    | 0    | 0    | 1    | 1    | 1                | 1 | ESRD |   |   |
| <b>Participant D</b>   |         |      |      |      |      |      |                  |   |      |   |   |
| Coronary heart disease | 0       | 0    | 0    | 0    | 0    | 0    | 0                | 0 | Died |   |   |
| Heart failure          | 0       | 0    | 0    | 0    | 0    | 0    | 0                | 0 | Died |   |   |

**Supplemental Figure 2: Histograms for years from CVD to ESRD**

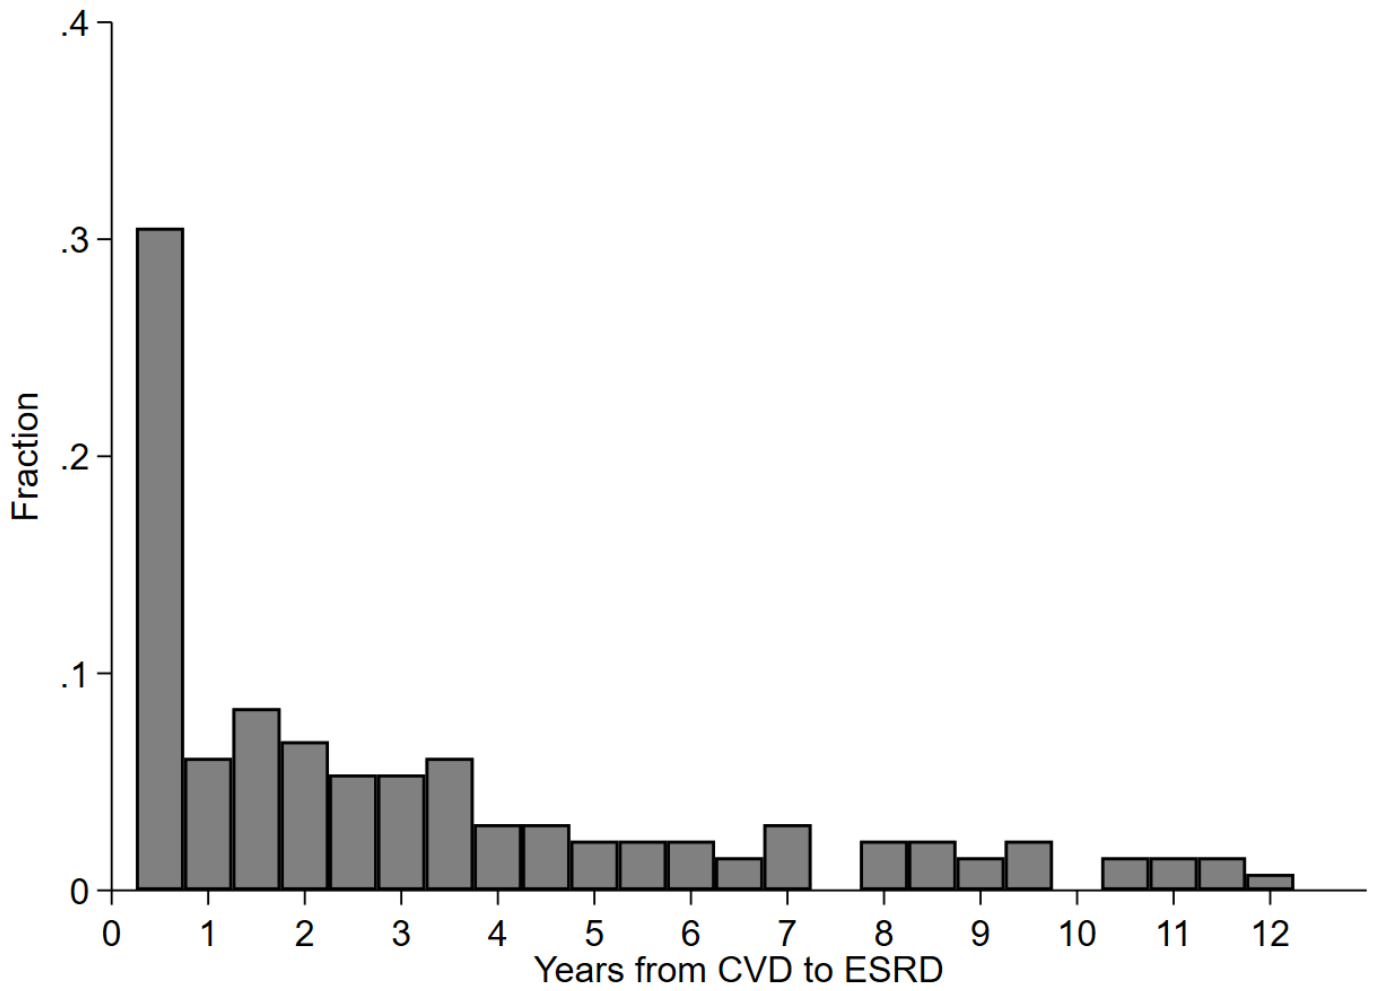

CVD indicates cardiovascular disease. ESRD indicates end-stage renal disease.
